# Supplementary material for: Elucidation of photophysical changes and orientation of acridine orange dye on the surface of borate capped gold nanoparticles using multi-spectroscopic techniques
Source: Royal Society of Chemistry journal article supplement (doi:10.1039/c4pp00223g), 2014-09-18
Supplement: c4pp00223g1.pdf [file c4pp00223g1.pdf]

**Elucidation of photophysical changes and orientation of acridine orange dye on the surface of borate capped gold nanoparticles by multi spectroscopic techniques**

**Arumugam Selva Sharma and Malaichamy Ilanchelian**  
**Department of Chemistry**  
**Bharathiar University, Coimbatore – 641046, Tamil Nadu, India.**

**Supporting information:**

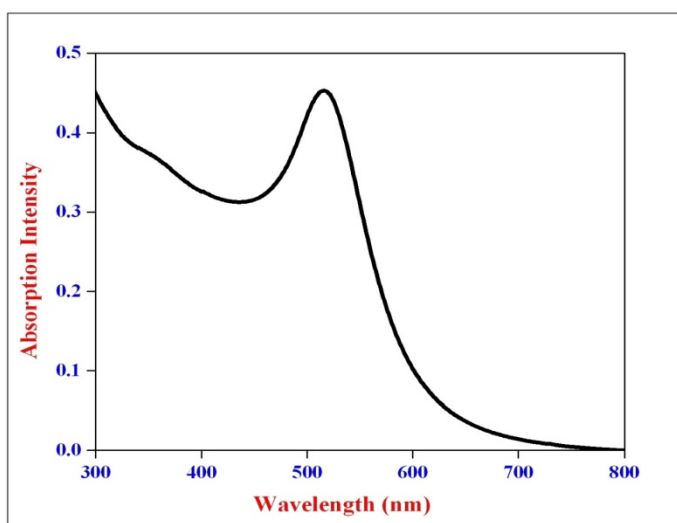

**Figure S1.** Absorption spectrum of Au NPs.

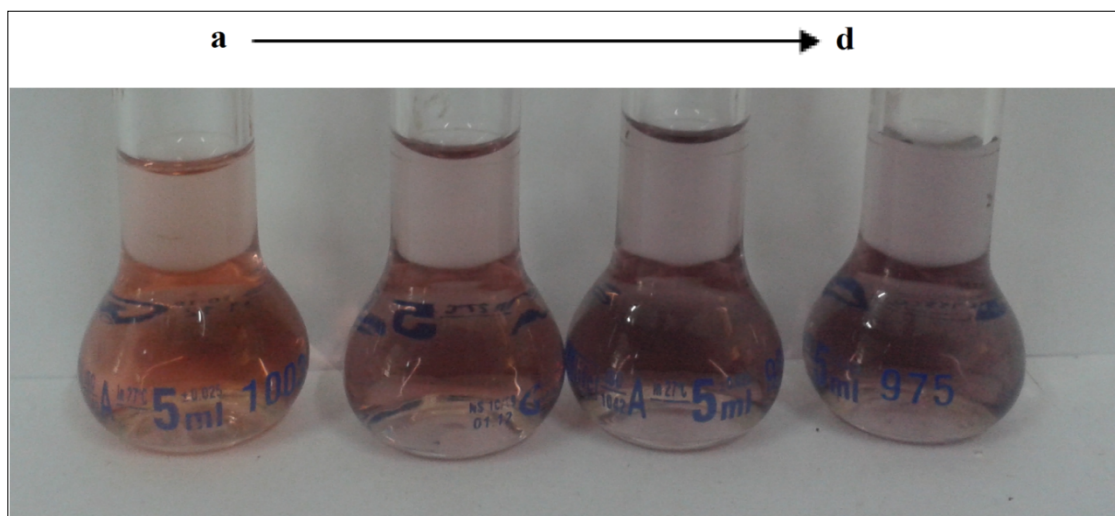

**Figure S2.** Photograph of Au NPs in presence of increasing concentrations of AO ([AO]: (a) 0.0, (b)  $1.50 \times 10^{-7}$ , (c)  $3.00 \times 10^{-7}$ , (d)  $4.50 \times 10^{-7}$  mol dm<sup>-3</sup>).
